# Supplementary material for: Investigating the Role of SNAI1 and ZEB1 Expression in Prostate Cancer Progression and Immune Modulation of the Tumor Microenvironment
Source: MDPI journal article supplement (doi:10.3390/cancers16081480), 2024-04-12
Supplement: s1 [file s1]

|                         | Term                              | Adjusted P-value | Genes                                               |
|-------------------------|-----------------------------------|------------------|-----------------------------------------------------|
| <b>PanCancer</b>        |                                   |                  |                                                     |
| <b>BCR</b>              | Epithelial Mesenchymal Transition | >0.001           | <i>COL1A1; SFRP4; COL3A1; COL1A2; COL5A2; INHBA</i> |
|                         | UV Response Dn                    | >0.001           | <i>COL1A1; COL3A1; COL1A2; COL5A2</i>               |
|                         | Angiogenesis                      | 0.0003           | <i>COL3A1; COL5A2</i>                               |
|                         | Myogenesis                        | 0.008            | <i>COL1A1; COL3A1</i>                               |
|                         |                                   |                  |                                                     |
| <b>Immune Profiling</b> |                                   |                  |                                                     |
| <b>BCR</b>              | Angiogenesis                      | 0.06             | <i>COL3A1</i>                                       |
|                         | TGF-beta Signaling                | 0.06             | <i>ENG</i>                                          |
|                         | UV Response Dn                    | 0.06             | <i>COL3A1</i>                                       |
|                         | IL-2/STAT5 Signaling              | 0.06             | <i>ICOS</i>                                         |
|                         | Myogenesis                        | 0.06             | <i>COL3A1</i>                                       |
|                         | KRAS Signaling Up                 | 0.06             | <i>ENG</i>                                          |
|                         | Interferon Gamma Response         | 0.06             | <i>IRF5</i>                                         |
|                         | Apical Junction                   | 0.06             | <i>SYK</i>                                          |
|                         | Estrogen Response Late            | 0.06             | <i>CXCL14</i>                                       |
|                         | Epithelial Mesenchymal Transition | 0.06             | <i>COL3A1</i>                                       |
|                         |                                   |                  |                                                     |
| <b>CAPRA-S</b>          | Angiogenesis                      | 0.06             | <i>NRP1; COL3A1</i>                                 |
|                         | Hedgehog Signaling                | 0.001            | <i>NRP1; THY1</i>                                   |
|                         | Epithelial Mesenchymal Transition | 0.001            | <i>COL3A1; FN1; THY1</i>                            |
|                         | Inflammatory Response             | 0.001            | <i>MSR1; CXCL10; CD14</i>                           |
|                         | IL-6/JAK/STAT3 Signaling          | 0.005            | <i>CXCL10; CD14</i>                                 |
|                         | UV Response Dn                    | 0.01             | <i>NRP1; COL3A1</i>                                 |
|                         | IL-2/STAT5 Signaling              | 0.01             | <i>NRP1; CXCL10</i>                                 |
|                         | Allograft Rejection               | 0.01             | <i>HLA-DRA; THY1</i>                                |
|                         | KRAS Signaling Up                 | 0.01             | <i>NRP1; CXCL10</i>                                 |

**Supplementary Table S2**
