# Supplementary material for: Investigating the Role of SNAI1 and ZEB1 Expression in Prostate Cancer Progression and Immune Modulation of the Tumor Microenvironment
Source: MDPI journal article supplement (doi:10.3390/cancers16081480), 2024-04-12
Supplement: s1 [file s1]

| Variable                           | FMRP                 |    | TCGA• |
|------------------------------------|----------------------|----|-------|
|                                    |                      | n  | n     |
| <b>BCR</b>                         |                      |    |       |
|                                    | no                   | 32 | 363   |
|                                    | yes                  | 19 | 57    |
|                                    | NA                   | -  | 68    |
| <b>Capra-S</b>                     |                      |    |       |
|                                    | low CAPRA-S          | 20 | 184   |
|                                    | Intermediate CAPRA-S | 21 | 196   |
|                                    | High CAPRA-S         | 10 | 108   |
| <b>pGS</b>                         |                      |    |       |
|                                    | 5                    | -  | -     |
|                                    | 6                    | 8  | 44    |
|                                    | 7                    | 37 | 242   |
|                                    | 8                    | 4  | 62    |
|                                    | 9                    | 2  | 136   |
|                                    | 10                   | -  | 3     |
|                                    | NA                   | -  | 1     |
| <b>ISUP</b>                        |                      |    |       |
|                                    | 1                    | 8  | -     |
|                                    | 2                    | 24 | -     |
|                                    | 3                    | 13 | -     |
|                                    | 4                    | 2  | -     |
|                                    | 5                    | 4  | -     |
| <b>TNM</b>                         |                      |    |       |
|                                    | pT1c                 | -  | -     |
|                                    | pT2                  | 2  | -     |
|                                    | pT2a                 | 2  | 13    |
|                                    | pT2b                 | 3  | 10    |
|                                    | pT2c                 | 30 | 162   |
|                                    | pT3a                 | 6  | 155   |
|                                    | pT3b                 | 7  | 131   |
|                                    | T4                   | -  | 11    |
|                                    | NA                   | -  | 6     |
| <b>pre-surgical<br/>PSA(ng/ml)</b> |                      |    |       |
|                                    | 0 to 6               | 16 | 382   |
|                                    | 6.01 to 10           | 12 | 6     |
|                                    | 10.01 to 20          | 19 | 11    |
|                                    | >20                  | 3  | 4     |
|                                    | NA                   | 1  | 85    |
| <b>Surgical Margin</b>             |                      |    |       |
|                                    | 0                    | 37 | 309   |
|                                    | 1                    | 14 | 150   |
| <b>Extraprostatic Invasion</b>     |                      |    |       |
|                                    | 0                    | 39 | 185   |
|                                    | 1                    | 12 | 297   |
|                                    | NA                   | -  | 6     |
| <b>Vesicular Invasion</b>          |                      |    |       |
|                                    | 0                    | 50 | 58    |
|                                    | 1                    | 1  | 19    |
|                                    | NA                   | -  | 411   |
| <b>Average</b>                     |                      |    |       |
| <b>Age at surgery</b>              |                      |    |       |
|                                    | 66                   |    | 61    |

**Supplementary Table S1.**
