# Supplementary material for: Investigating the Role of SNAI1 and ZEB1 Expression in Prostate Cancer Progression and Immune Modulation of the Tumor Microenvironment
Source: MDPI journal article supplement (doi:10.3390/cancers16081480), 2024-04-12
Supplement: s1 [file s1]

| Term                              | Adjusted P-value | Genes                                                                                                                                                                                               |
|-----------------------------------|------------------|-----------------------------------------------------------------------------------------------------------------------------------------------------------------------------------------------------|
| <b>Immune profiling</b>           |                  |                                                                                                                                                                                                     |
| Allograft Rejection               | >0.001           | <i>ITGB2; CFP; ETS1; CD3D; CTSS; ICAM1; CCL7; IL12A; MAP3K7; ELANE; CCR2; IL10; IL11; TGFB2; IL13; LY86; LIF; IL18; IL16; HLA-G; IL4; NCR1; TLR1; PTPRC; CD8B; IL1B; HLA-DRA; IRF8; KLRD1; CD47</i> |
| Inflammatory Response             | >0.001           | <i>IL10; MSR1; IFITM1; IL10RA; LIF; IL18; PLAUR; OSM; CYBB; ICAM4; MEFV; ICAM1; TLR1; CXCL10; IL1A; CCL7; IRF1; IL1B; C3AR1; CMKLR1</i>                                                             |
| KRAS Signaling Up                 | >0.001           | <i>CSF2; IL10RA; ITGB2; LIF; PLAUR; LY96; PPBP; ETS1; CTSS; CXCL10; IL1B; C3AR1; PECAM1; IRF8; CMKLR1</i>                                                                                           |
| TNF-alpha Signaling via NF-kB     | >0.001           | <i>CSF2; SERPINB2; LIF; IL18; PLAUR; CXCL3; TANK; ICAM1; NFKB2; CXCL10; IL1A; IL23A; IRF1; IL1B</i>                                                                                                 |
| Interferon Gamma Response         | >0.001           | <i>IFITM2; C1S; C1R; IL10RA; HLA-G; ICAM1; CXCL10; CCL7; CASP3; IRF1; CASP1; SERPING1; IRF8; CMKLR1</i>                                                                                             |
| Complement                        | >0.001           | <i>CR2; SERPINB2; LRP1; C1S; C1R; FN1; PLAUR; CTSS; C3; CTSL; CASP3; IRF1; CASP1; SERPING1</i>                                                                                                      |
| Coagulation                       | >0.001           | <i>C3; C8G; SERPINB2; C1S; LRP1; C1R; FN1; PECAM1; SERPING1; MASP2</i>                                                                                                                              |
| IL-6/JAK/STAT3 Signaling          | >0.001           | <i>CXCL10; CSF2; ITGA4; CCL7; IL1B; IRF1; PDGFC; CXCL3</i>                                                                                                                                          |
| Apoptosis                         | >0.001           | <i>PDGFRB; IL1A; TGFB2; CASP3; IL1B; IRF1; PSEN2; CASP1; IL18; BAX</i>                                                                                                                              |
| Interferon Alpha Response         | >0.001           | <i>CXCL10; IFITM1; IFITM2; C1S; IRF1; CASP1; CD47</i>                                                                                                                                               |
| IL-2/STAT5 Signaling              | >0.001           | <i>IL10; CXCL10; CSF2; CASP3; IL10RA; IL13; LIF; TNFSF11; IRF8</i>                                                                                                                                  |
| Epithelial Mesenchymal Transition | 0.006            | <i>PDGFRB; ITGB1; COL3A1; CXCL12; LRP1; FN1; PLAUR</i>                                                                                                                                              |
| Apical Junction                   | 0.025            | <i>ITGB1; MAPK11; PTPRC; PECAM1 ;ICAM4; ICAM1</i>                                                                                                                                                   |
| <b>PanCancer</b>                  |                  |                                                                                                                                                                                                     |
| Wnt-beta Catenin Signaling        | 0.0004           | <i>DKK4; WNT6; JAG1; LEF1</i>                                                                                                                                                                       |
| Epithelial Mesenchymal Transition | 0.06             | <i>PDGFRB; COL3A1; COL5A1; LAMA1</i>                                                                                                                                                                |
| Angiogenesis                      | 0.064            | <i>COL3A1; JAG1</i>                                                                                                                                                                                 |
| UV Damage Response                | 0.09             | <i>PDGFRB; COL3A1; LTBP1</i>                                                                                                                                                                        |

**Supplementary Table S4**
