# Supplementary material for: Investigating the Role of SNAI1 and ZEB1 Expression in Prostate Cancer Progression and Immune Modulation of the Tumor Microenvironment
Source: MDPI journal article supplement (doi:10.3390/cancers16081480), 2024-04-12
Supplement: s1 [file s1]

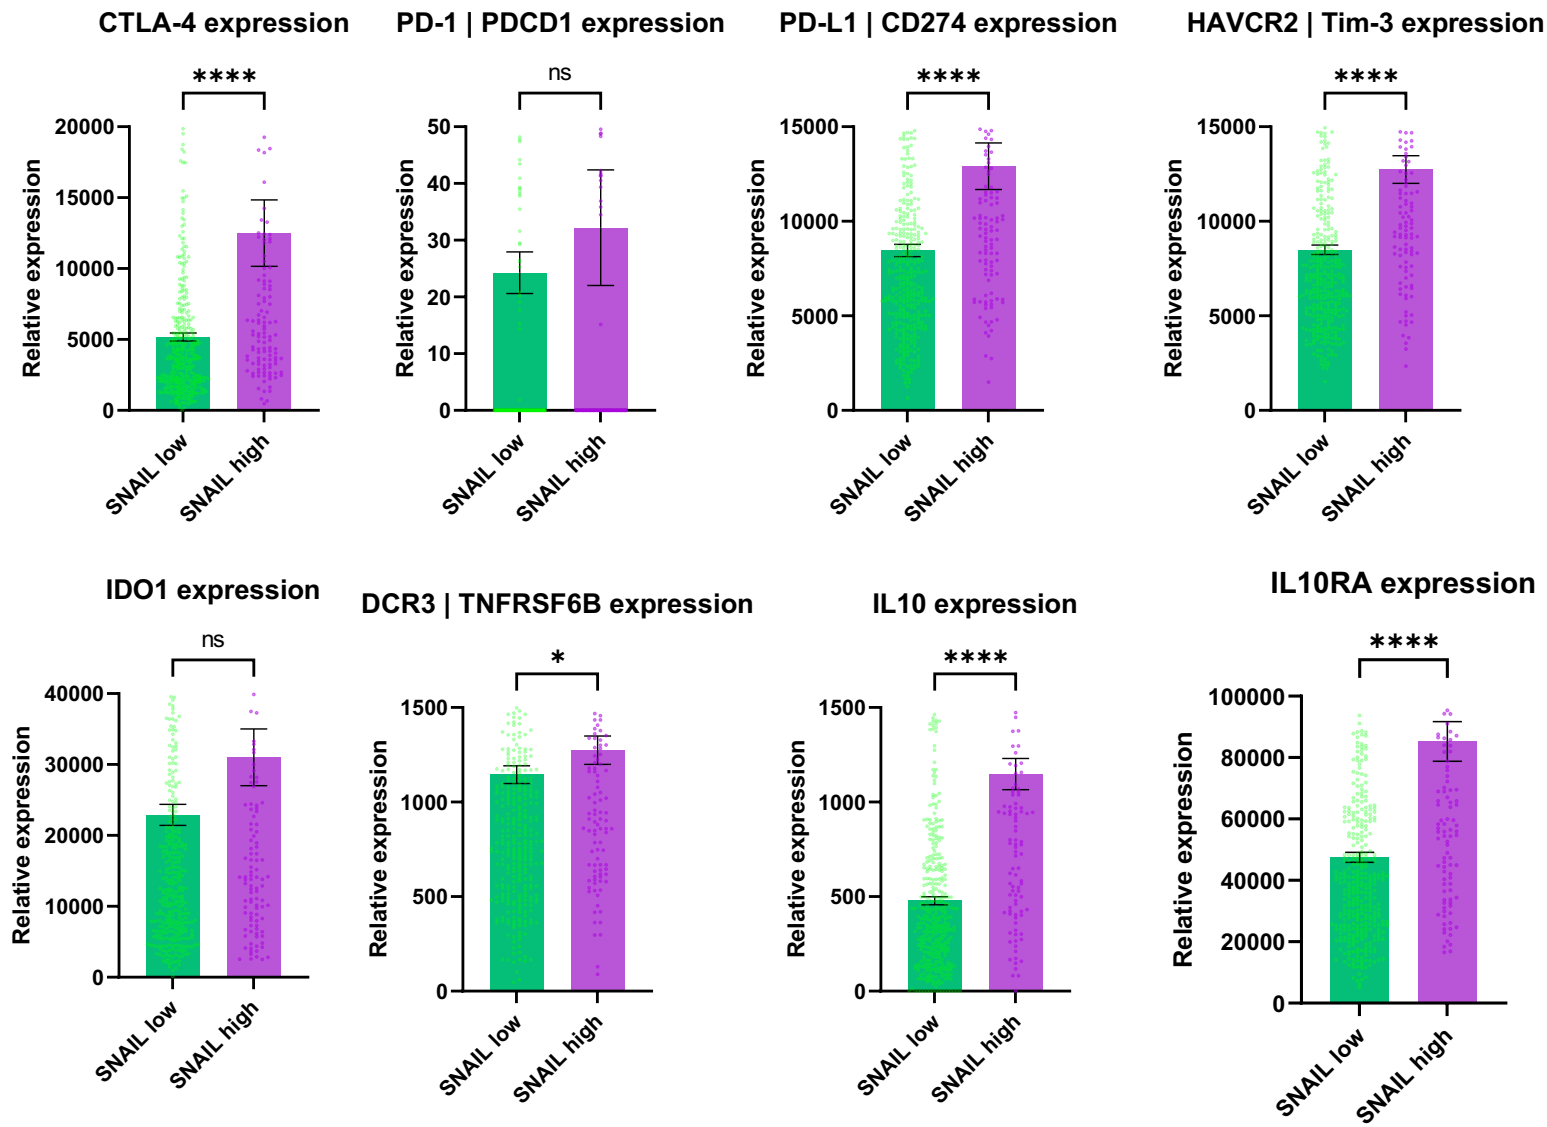

**Supplementary Figure S4**  
**Effects of high and low SNAI1 expression on relative expression of checkpoint genes** - Analysis of expression of known immunomodulatory markers shows increased relative expression of *CTLA-4*, *PD-L1*, *HAVCR2* (*TIM-3*), *IDO1*, *DCR3*, *IL10* and *IL10RA* in the SNAI1 high group (n =366) compared to low group (n =122) in the TCGA cohort. \*P<0.05, Mann-Whitney test.
