# Supplementary figures and images for: Investigating the Role of SNAI1 and ZEB1 Expression in Prostate Cancer Progression and Immune Modulation of the Tumor Microenvironment
Source: MDPI journal article supplement (doi:10.3390/cancers16081480), 2024-04-12

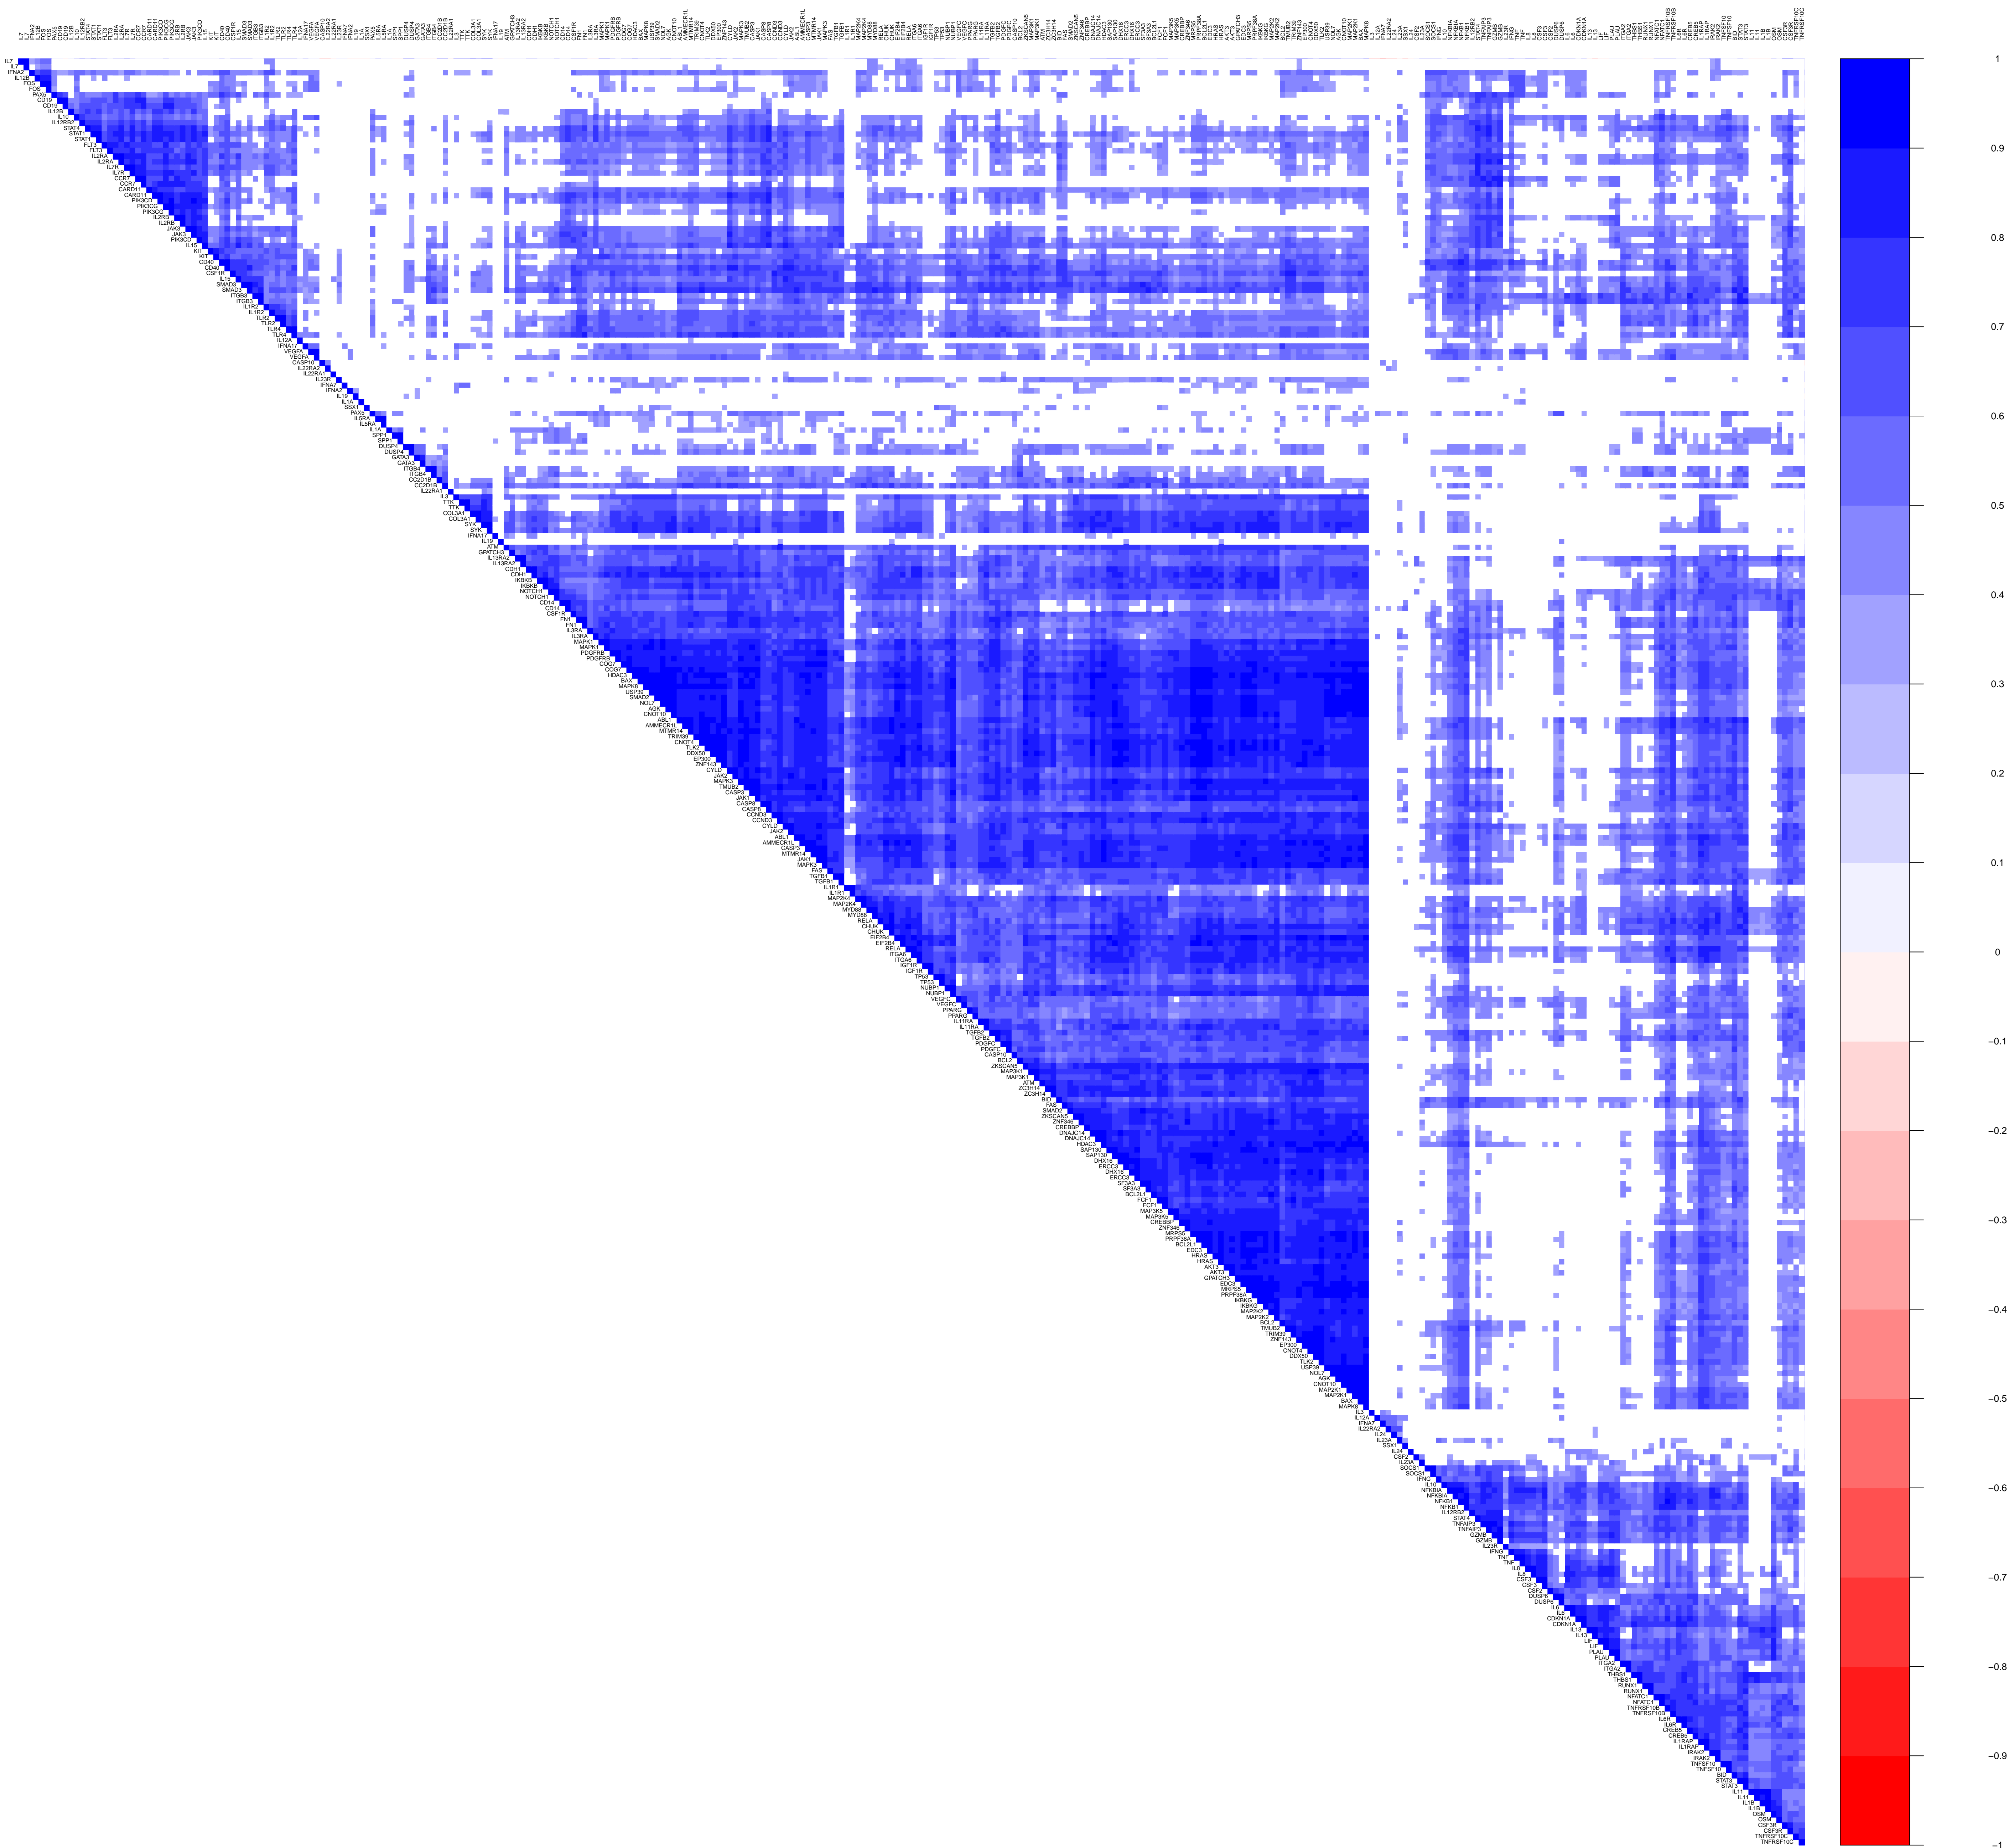

Supplement: s1 [file s1]

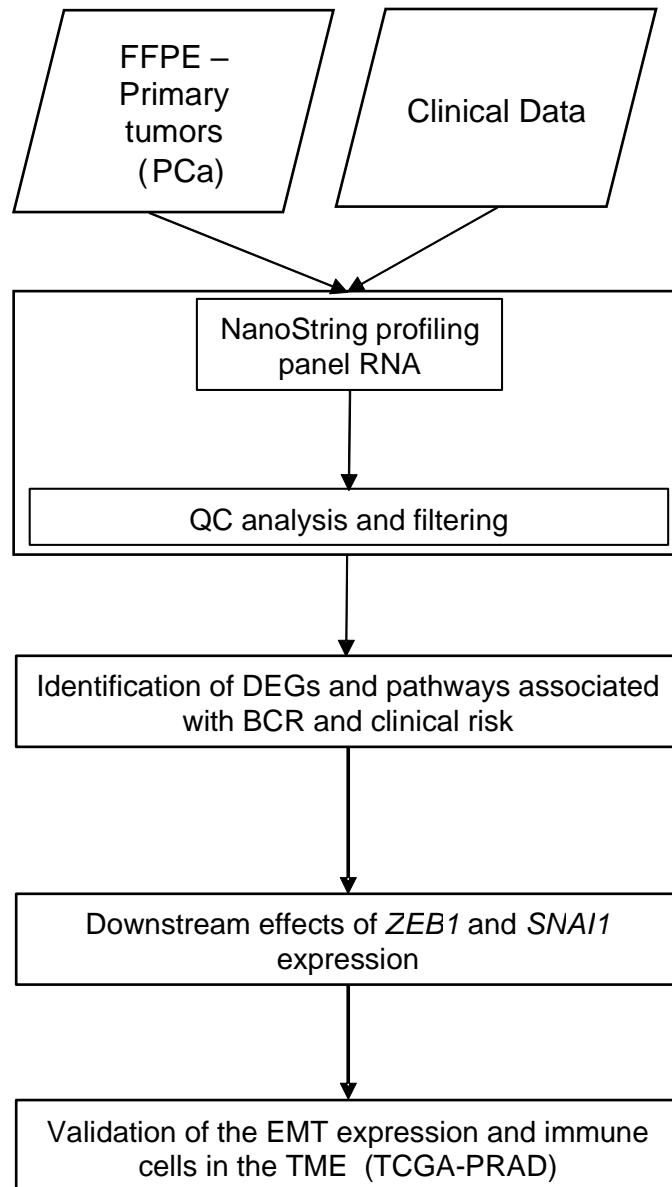

**Supplementary Figure S2**

Supplement: s1 [file s1]
